# Supplementary material for: Converting systematic reviews to Cochrane format: a cross-sectional survey of Australian authors of systematic reviews
Source: Springer Nature journal article supplement (doi:10.1186/1472-6963-3-2), 2003-01-17
Supplement: Additional file 1 [file 1472-6963-3-2-s1.doc]

**Australasian Cochrane Centre Conversion Needs Assessment**

1. Have you heard about the Cochrane Collaboration and Cochrane reviews?  Yes  No
2. If yes, why did you not undertake a Cochrane review?

| *Factor* | *True for you?* | *Comments* |
| --- | --- | --- |
| Need to undergo specific Cochrane training | Yes  No |  |
| Difficulty with Cochrane system | Yes  No |  |
| Not willing to update review | Yes  No |  |
| Timeline too tight | Yes  No |  |
| Lack of time | Yes  No |  |
| Topic was already registered with Cochrane | Yes  No | If yes, was it the title  protocol or full review? |
| Other issues | Yes  No |  |

1. Now that your review has been published, would you consider converting your review to a Cochrane review and publishing it on the Cochrane Library?  Yes  No
2. If you answered yes to question 3, what resources or support would you need to convert your review to Cochrane format?

| *Factor* | *True for you?* | *Comments* |
| --- | --- | --- |
| Data entry | Yes  No |  |
| Learning the Cochrane system | Yes  No |  |
| Statistical support | Yes  No |  |
| Financial support | Yes  No |  |
| Institutional support | Yes  No |  |
| Dedicated time | Yes  No |  |
| Obtaining articles | Yes  No |  |
| Obtaining translation of articles | Yes  No |  |
| Project management | Yes  No |  |
| Assistance with updating | Yes  No |  |
| Other support | Yes  No |  |

1. If you answered no to question 3, would help with any of the following lead you to reconsider publishing your review on the Cochrane Library?

| *Factor* | *True for you?* | *Comments* |
| --- | --- | --- |
| Data entry | Yes  No |  |
| Learning the Cochrane system | Yes  No |  |
| Statistical support | Yes  No |  |
| Financial support | Yes  No |  |
| Institutional support | Yes  No |  |
| Dedicated time | Yes  No |  |
| Obtaining articles | Yes  No |  |
| Obtaining translation of articles | Yes  No |  |
| Project management | Yes  No |  |
| Assistance with updating | Yes  No |  |
| Other support | Yes  No |  |

1. Would you object to someone else converting your review to Cochrane format?  Yes  No Would you like to be consulted on the choice of author?  Yes  No Comments:
2. At the second stage of this project we may need to contact reviewers by phone to discuss issues raised by the survey. May a staff member of the ACC telephone you?  Yes  No Is any particular time more convenient for you?                      What is the best number on which to reach you?

Thank you very much for your help.
